# Supplementary material
Source: PubMed Central journal article supplement (PMC420112)

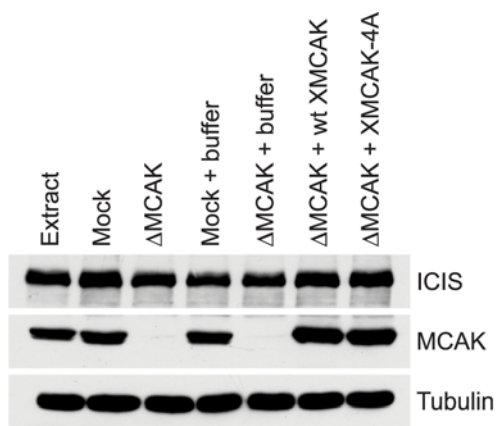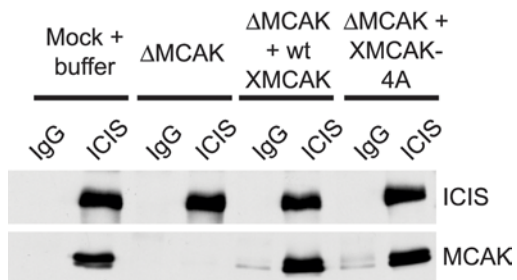

Supplement: mbc_15_6_2895__1.pdf [file mbc_15_6_2895__1.pdf]
